# Supplementary material for: Polyoxometalate–covalent organic framework hybrid materials for pH-responsive photothermal tumor therapy
Source: Royal Society of Chemistry journal article supplement (doi:10.1039/d1tb02255e), 2022-01-01
Supplement: d1tb02255e1.pdf [file d1tb02255e1.pdf]

## **Polyoxometalate-Covalent Organic Framework Hybrid Materials for the pH-Responsive Photothermal Tumor Therapy**

Wenxin Wang,<sup>a</sup> Yuting Song,<sup>a</sup> Jiayi Chen,<sup>a</sup> Yanyan Yang,<sup>c</sup> Jiawei Wang,<sup>a</sup> Yan Song,<sup>a</sup> Jiatong Ni,<sup>a</sup> Minglu Tang,<sup>a</sup> Junge Zhao, Yuan Sun<sup>b\*</sup>, Tiedong Sun<sup>a\*</sup>, Jinsong Peng<sup>a\*</sup>

<sup>a</sup> *Key Laboratory of Forest Plant Ecology, Ministry of Education, Engineering Research Center of Forest Bio-Preparation, College of Chemistry, Chemical Engineering and Resource Utilization, Northeast Forestry University, Harbin, 150040 P. R. China*

<sup>b</sup> *Center of Pharmaceutical Engineering and Technology; College of Pharmacy; Harbin University of Commerce, Harbin, 150076, P. R. China*

<sup>c</sup> *Liaoning Haisco Pharmaceutical Co.,Ltd, Shenyang, 110000, P. R. China*

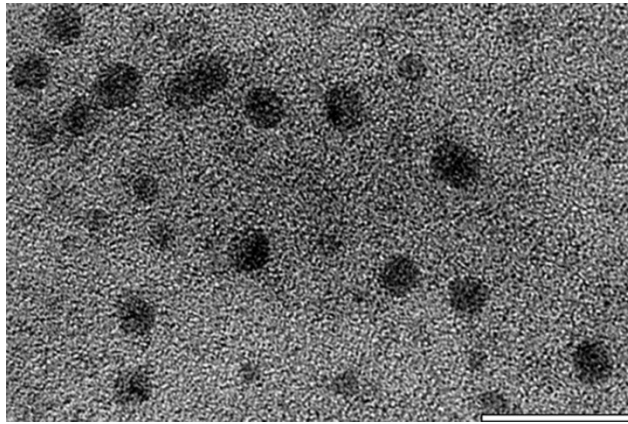

**Figure S1.** The TEM image of HPB. The scale bar =20 nm

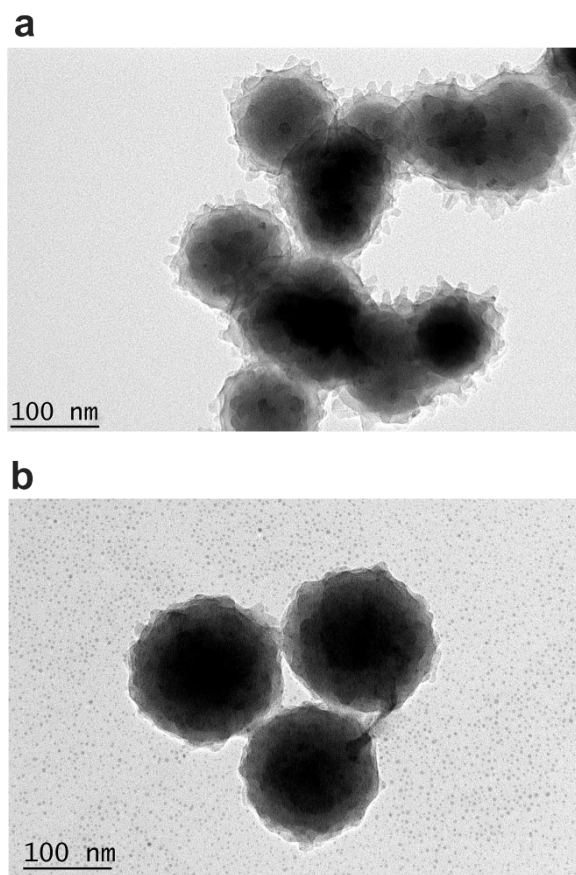

**Figure S2** The TEM images of HPB@COF before stirring(a) and after stirring for 24 h at pH=5(b)

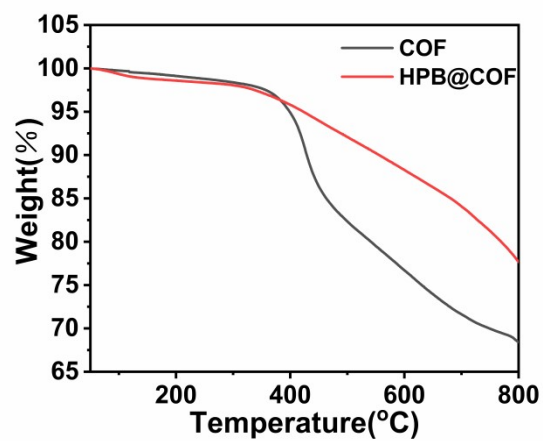

**Figure S3.** The TGA curves for COF and HPB@COF, respectively

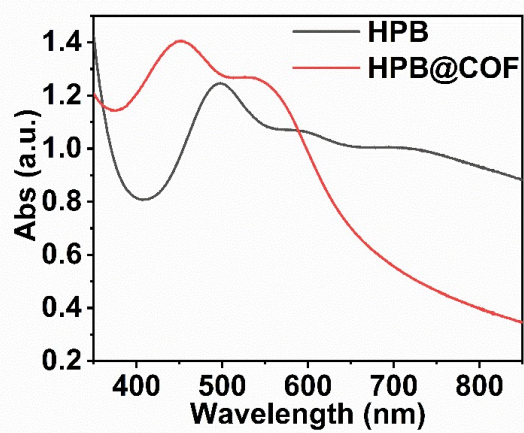

Figure S4. The UV-Vis spectra of HPB and HPB@COF

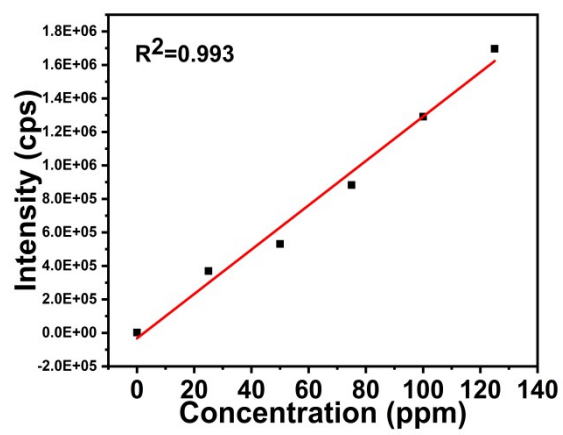

**Figure S5.** The standard curve fitting of tungsten in HPB by the ICP analysis

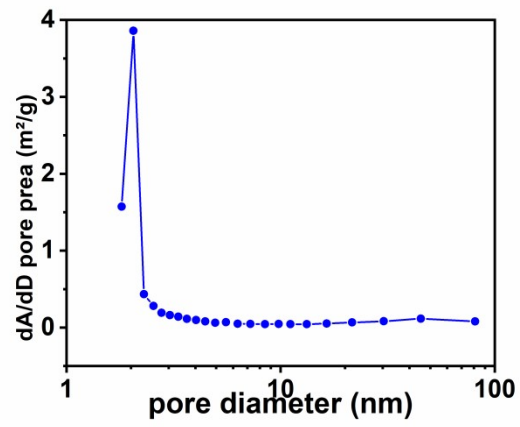

**Figure S6.** The pore size distribution curve of COF.

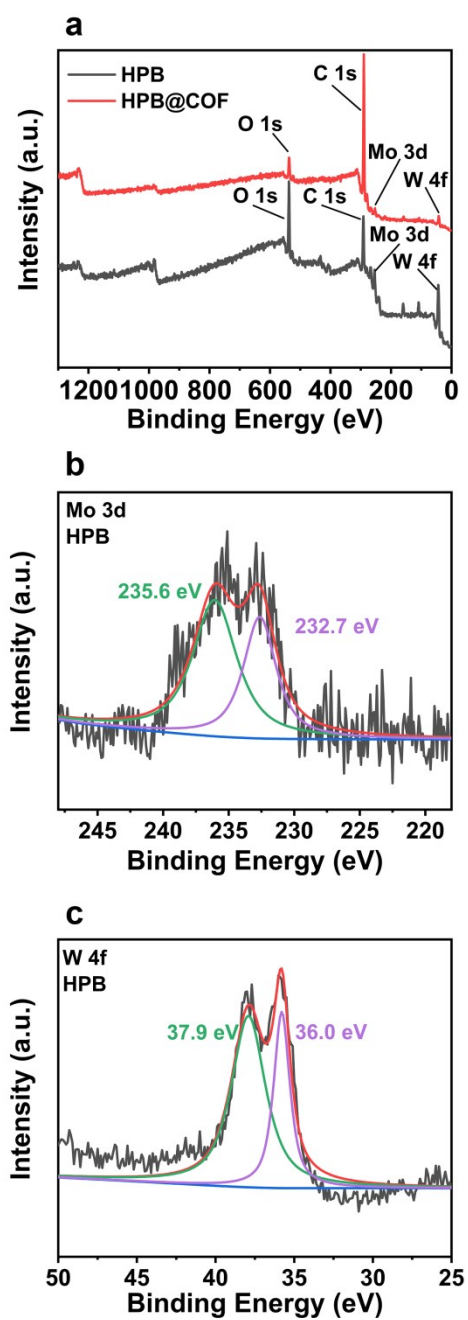

**Figure S7.** (a) the XPS spectra of HPB and HPB@COF; (b) the XPS spectra of Mo 3d in HPB; (c) the XPS spectra of W 4f in HPB



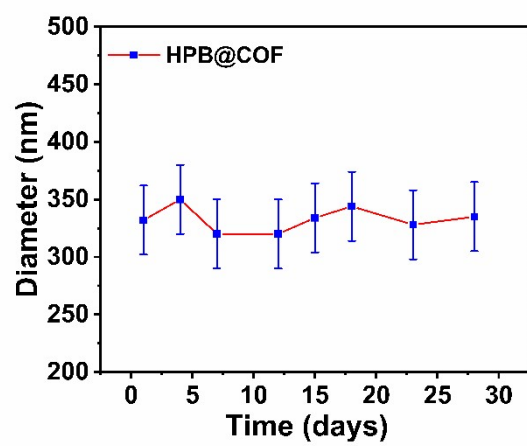

**Figure S8.** The average diameter of the HPB@COF NPs dispersed in water for 28 d

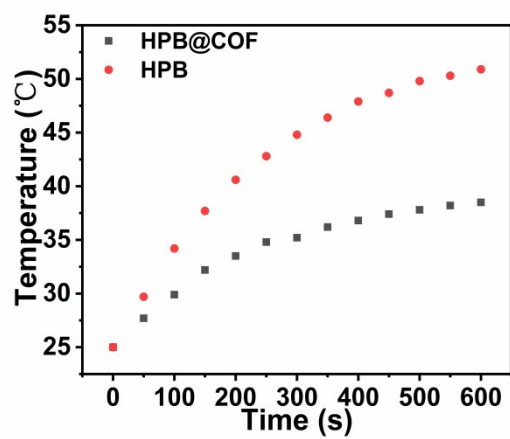

**Figure S9.** The corresponding temperature vs the time curves of HPB (250  $\mu\text{g/mL}$ , 1.0 mL) and HPB@COF (500  $\mu\text{g/mL}$ , 1.0 mL) illuminated with a NIR laser (808 nm,  $1.5\text{W}\cdot\text{cm}^{-2}$ )

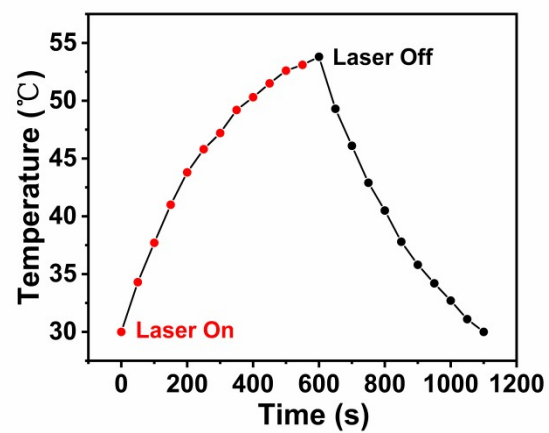

**Figure S10.** The photothermal profile of the HPB dispersion (250  $\mu\text{g/mL}$ , 1.0 mL) illuminated with NIR laser (808 nm, 1.5 W) for 15 min in order to reach a plateau, following natural cooling under ambient temperature

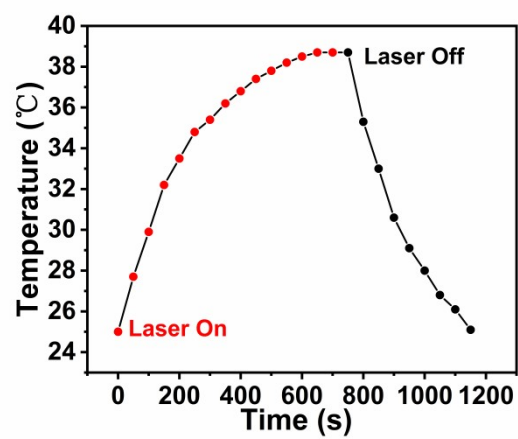

**Figure S11.** The photothermal profile of HPB@COF dispersion (500  $\mu\text{g/mL}$ , 1.0 mL) illuminated with NIR laser (808 nm, 1.5 W) for 15 min in order to reach a plateau, following natural cooling under ambient temperature

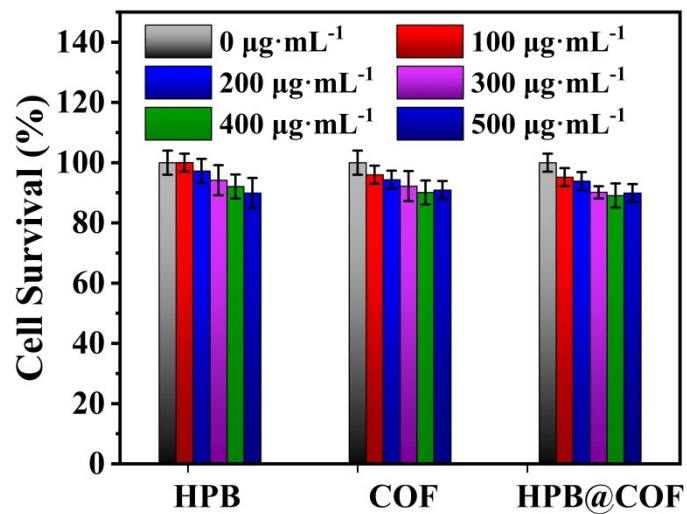

**Figure S12.** The cell viability of C929 cells after incubation with different concentrations of HPB, COF and HPB@COF NPs, respectively

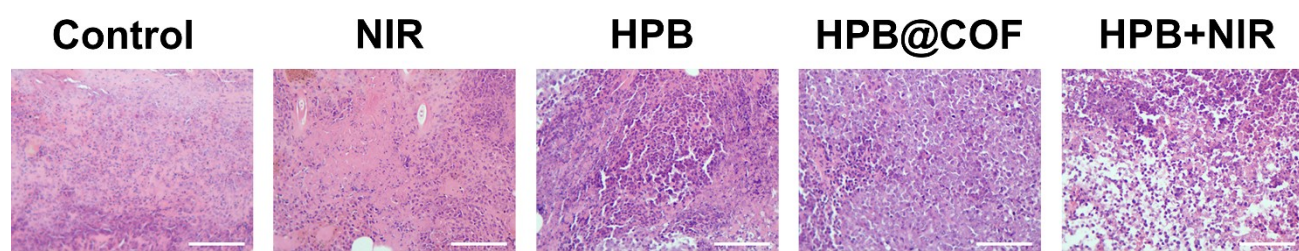

**Figure S13.** The H&E images of tumor slices after different treatments. The scale bar =200  $\mu$ m
